# Supplementary material for: Manipulating charge carrier interactions at solid electrolyte interfaces for enhanced micro-supercapacitor performance
Source: Royal Society of Chemistry journal article supplement (doi:10.1039/d5ra02402a), 2025-01-01
Supplement: d5ra02402a1.pdf [file d5ra02402a1.pdf]

Electronic Supplementary Material (ESI) for RSC Advances

**Manipulating Charge Carrier Interactions at Solid Electrolyte Interfaces for Enhanced Micro-supercapacitor Performance**

Abhirami Sukumaran, Premkumar Jayaraman and Helen Annal Therese

Futuristic Energy Storage Technology Lab (FESTL),

Department of Chemistry, SRM Institute of Science & Technology, Chennai

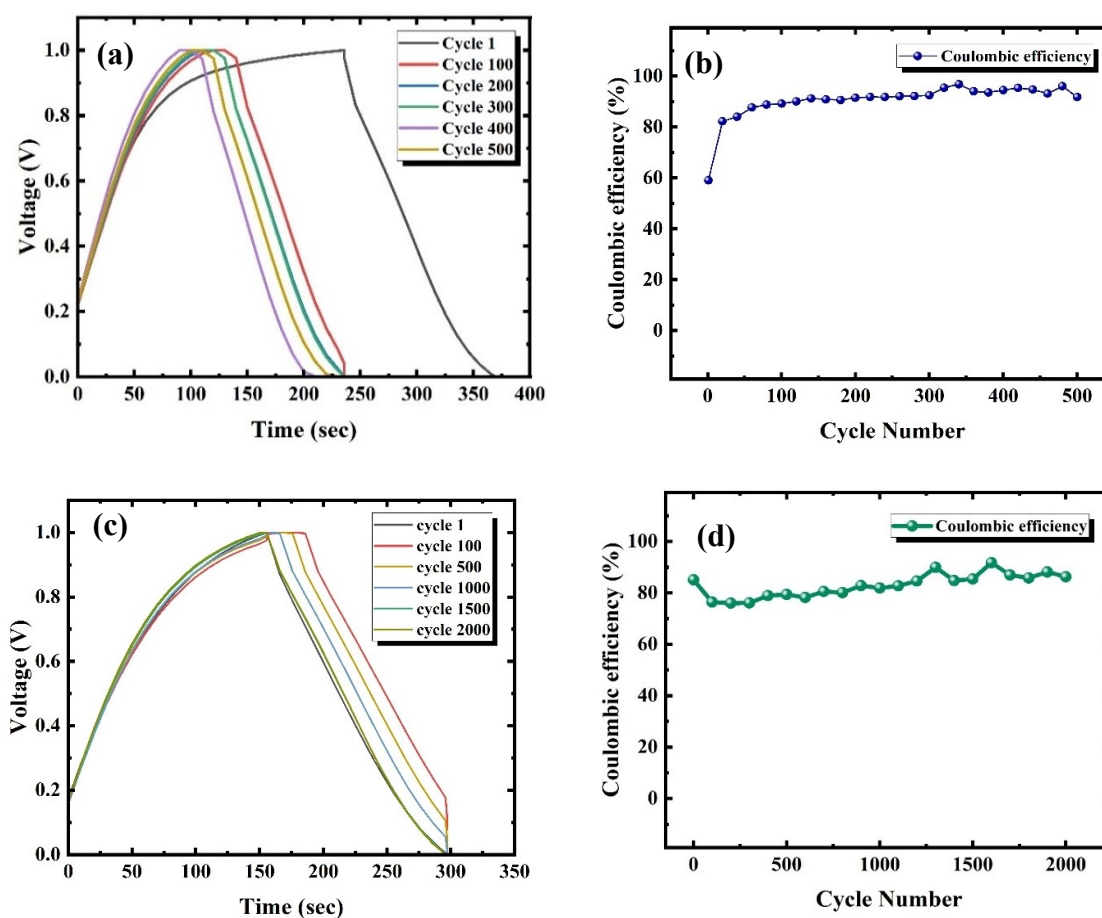

**Fig S1 a & b)** GCD profile and Coulombic efficiency of device of SS/PVA-LiClO<sub>4</sub>/SS

**c & d)** GCD profile and Coulombic efficiency of device SS/PVA-LiClO<sub>4</sub>+Li<sub>2</sub>SO<sub>4</sub>/SS

Despite exhibiting a slightly lower coulombic efficiency than SS/PVA-LiClO<sub>4</sub> /SS (**Fig S1(b,d)**), the inclusion of Li<sub>2</sub>SO<sub>4</sub> is advantageous overall, since it promotes

pseudocapacitive redox reactions at the electrode/electrolyte interface, enhancing specific capacitance and cycling stability, hence enabling the device to maintain its performance over a greater number of cycles. Although these faradaic processes may induce minor side reactions that reduce coulombic efficiency per cycle [39][43][44], the overall energy storage and long-term dependability are significantly enhanced, making the  $\text{Li}_2\text{SO}_4$  based device the superior option for high-performance supercapacitors.
